# Supplementary material
Source: HighWire-hosted journal article supplement (https://sti.bmj.com/content/sextrans-2024-056313)
Supplement: inline-supplementary-material-1 [file inline-supplementary-material-1.pdf]

## Supplementary Tables

**Supplementary Table 1.** Characteristics of female clients undergoing regular testing (regular) and extended oral testing (pilot)

| Characteristics                             | Overall<br>N (%)  | Regular testing<br>N (%) | Pilot - extended<br>testing<br>N (%) | <i>P</i> -value<br>regular vs.<br>pilot |
|---------------------------------------------|-------------------|--------------------------|--------------------------------------|-----------------------------------------|
| <b>Total</b>                                | 1110 (100%)       | 1047 (100%)              | 63 (100%)                            |                                         |
| <b>Age</b>                                  |                   |                          |                                      | 0.904                                   |
| Mean (SD)                                   | 25.0 (6.79)       | 25.0 (6.80)              | 24.9 (6.63)                          |                                         |
| Median [min, max]                           | 23.0 [14.0, 69.0] | 23.0 [14.0, 69.0]        | 23.0 [18.0, 52.0]                    |                                         |
| <b>Age category</b>                         |                   |                          |                                      | 0.321                                   |
| <25 years                                   | 738 (66.5%)       | 692 (66.1%)              | 46 (73.0%)                           |                                         |
| 25 years and older                          | 372 (33.5%)       | 355 (33.9%)              | 17 (27.0%)                           |                                         |
| <b>Non-western migratory background</b>     |                   |                          |                                      | 0.350                                   |
| Yes, first generation                       | 173 (15.6%)       | 163 (15.6%)              | 10 (15.9%)                           |                                         |
| Yes, second generation                      | 223 (20.1%)       | 205 (19.6%)              | 18 (28.6%)                           |                                         |
| No                                          | 712 (64.1%)       | 677 (64.7%)              | 35 (55.6%)                           |                                         |
| Unknown                                     | 2 (0.2%)          | 2 (0.2%)                 | 0 (0.0%)                             |                                         |
| <b>Education level<sup>1</sup></b>          |                   |                          |                                      | 0.885                                   |
| Low                                         | 64 (5.8%)         | 61 (5.8%)                | 3 (4.8%)                             |                                         |
| Middle                                      | 281 (25.3%)       | 265 (25.3%)              | 16 (25.4%)                           |                                         |
| High                                        | 731 (65.9%)       | 688 (65.7%)              | 43 (68.3%)                           |                                         |
| Other/unknown                               | 34 (3.1%)         | 33 (3.2%)                | 1 (1.6%)                             |                                         |
| <b>Notified for any STI</b>                 | 171 (15.4%)       | 161 (15.4%)              | 10 (15.9%)                           | 1.000                                   |
| <b>Notified for chlamydia</b>               | 121 (10.9%)       | 115 (11.0%)              | 6 (9.5%)                             | 0.878                                   |
| <b>Notified for gonorrhoea</b>              | 28 (2.5%)         | 26 (2.5%)                | 2 (3.2%)                             | 1.000                                   |
| <b>Any STI-related complaints</b>           | 470 (42.3%)       | 444 (42.4%)              | 26 (41.3%)                           | 0.963                                   |
| <b>Number of sex partners last 6 months</b> |                   |                          |                                      | <0.001                                  |
| 0 partners                                  | 13 (1.2%)         | 8 (0.8%)                 | 5 (7.9%)                             |                                         |
| 1 partner                                   | 323 (29.1%)       | 296 (28.3%)              | 27 (42.9%)                           |                                         |
| 2 partners                                  | 260 (23.4%)       | 241 (23.0%)              | 19 (30.2%)                           |                                         |
| 3-5 partners                                | 337 (30.4%)       | 325 (31.0%)              | 12 (19.0%)                           |                                         |
| 6-10 partners                               | 89 (8.0%)         | 89 (8.5%)                | 0 (0.0%)                             |                                         |
| ≥10 partners                                | 25 (2.3%)         | 25 (2.4%)                | 0 (0.0%)                             |                                         |
| Unknown                                     | 63 (5.7%)         | 63 (6.0%)                | 0 (0.0%)                             |                                         |
| <b>Sex worker</b>                           | 67 (6.0%)         | 67 (6.4%)                | 0 (0.0%)                             | 0.072                                   |
| <b>Vaginal gonorrhoea test</b>              | 1109 (99.9%)      | 1046 (99.9%)             | 63 (100%)                            | 1.000                                   |
| <b>Anorectal gonorrhoea test</b>            | 338 (30.5%)       | 334 (31.9%)              | 4 (6.3%)                             | <0.001                                  |
| <b>Oropharyngeal gonorrhoea test</b>        | 1070 (96.4%)      | 1007 (96.2%)             | 63 (100%)                            | 0.218                                   |

Abbreviations: max, maximum; min, minimum; SD, standard deviation; STI, sexually transmitted infection.

<sup>1</sup> Educational level; Low: no education, elementary school, (pre-)vocational education; Middle: senior secondary education, pre-university education; High: university of applied sciences, university.

**Supplementary Table 2.** Characteristics of gonorrhoea positive MSW and female clients

| Characteristics                             | Overall<br>N (%)  | MSW<br>Any location<br>N (%) | MSW<br>Oropharyngeal<br>N (%) | Women<br>Any location<br>N (%) | Women<br>Oropharyngeal<br>N (%) |
|---------------------------------------------|-------------------|------------------------------|-------------------------------|--------------------------------|---------------------------------|
| <b>Gonorrhoea diagnosis</b>                 | 103 (100%)        | 36 (100%)                    | 27 (100%)                     | 67 (100%)                      | 46 (100%)                       |
| <b>Age</b>                                  |                   |                              |                               |                                |                                 |
| Mean (SD)                                   | 23.6 (5.87)       | 24.7 (6.35)                  | 23.4 (4.92)                   | 23.0 (5.55)                    | 23.4 (6.41)                     |
| Median [min, max]                           | 22.0 [17.0, 51.0] | 23.0 [17.0, 43.0]            | 23.0 [17.0, 43.0]             | 21.0 [17.0, 51.0]              | 21.0 [17.0, 51.0]               |
| <b>Age category</b>                         |                   |                              |                               |                                |                                 |
| <25 years                                   | 77 (74.8%)        | 25 (69.4%)                   | 21 (77.8%)                    | 52 (77.6%)                     | 35 (76.1%)                      |
| 25 years and older                          | 26 (25.2%)        | 11 (30.6%)                   | 6 (22.2%)                     | 15 (22.4%)                     | 11 (23.9%)                      |
| <b>Non-western migratory background</b>     |                   |                              |                               |                                |                                 |
| Yes, first generation                       | 14 (13.6%)        | 6 (16.7%)                    | 2 (7.4%)                      | 8 (11.9%)                      | 4 (8.7%)                        |
| Yes, second generation                      | 15 (14.6%)        | 9 (25.0%)                    | 6 (22.2%)                     | 6 (9.0%)                       | 3 (6.5%)                        |
| No                                          | 73 (70.9%)        | 21 (58.3%)                   | 19 (70.4%)                    | 52 (77.6%)                     | 38 (82.6%)                      |
| Unknown                                     | 1 (1.0%)          | 0 (0.0%)                     | 0 (0.0%)                      | 1 (1.5%)                       | 1 (2.2%)                        |
| <b>Education level<sup>1</sup></b>          |                   |                              |                               |                                |                                 |
| Low                                         | 11 (10.7%)        | 5 (13.9%)                    | 2 (7.4%)                      | 6 (9.0%)                       | 3 (6.5%)                        |
| Middle                                      | 34 (33.0%)        | 15 (41.7%)                   | 9 (33.3%)                     | 19 (28.4%)                     | 11 (23.9%)                      |
| High                                        | 55 (53.4%)        | 16 (44.4%)                   | 16 (59.3%)                    | 39 (58.2%)                     | 29 (63.0%)                      |
| Other/unknown                               | 3 (2.9%)          | 0 (0.0%)                     | 0 (0.0%)                      | 3 (4.5%)                       | 3 (6.5%)                        |
| <b>Notified for any STI</b>                 | 41 (39.8%)        | 14 (38.9%)                   | 12 (44.4%)                    | 27 (40.3%)                     | 21 (45.7%)                      |
| <b>Notified for chlamydia</b>               | 22 (21.4%)        | 8 (22.2%)                    | 7 (25.9%)                     | 14 (20.9%)                     | 10 (21.7%)                      |
| <b>Notified for gonorrhoea</b>              | 21 (20.4%)        | 7 (19.4%)                    | 6 (22.2%)                     | 14 (20.9%)                     | 11 (23.9%)                      |
| <b>Any STI-related complaints</b>           | 55 (53.4%)        | 17 (47.2%)                   | 12 (44.4%)                    | 38 (56.7%)                     | 25 (54.3%)                      |
| <b>Number of sex partners last 6 months</b> |                   |                              |                               |                                |                                 |
| 0 partners                                  | 8 (7.8%)          | 4 (11.1%)                    | 4 (14.8%)                     | 4 (6.0%)                       | 2 (4.3%)                        |
| 1 partner                                   | 22 (21.4%)        | 7 (19.4%)                    | 5 (18.5%)                     | 15 (22.4%)                     | 7 (15.2%)                       |
| 2 partners                                  | 42 (40.8%)        | 14 (38.9%)                   | 11 (40.7%)                    | 28 (41.8%)                     | 21 (45.7%)                      |
| 3-5 partners                                | 22 (21.4%)        | 9 (25.0%)                    | 5 (18.5%)                     | 13 (19.4%)                     | 11 (23.9%)                      |
| 6-10 partners                               | 3 (2.9%)          | 2 (5.6%)                     | 2 (7.4%)                      | 1 (1.5%)                       | 0 (0.0%)                        |
| ≥10 partners                                | 1 (1.0%)          | 0 (0.0%)                     | 0 (0.0%)                      | 1 (1.5%)                       | 1 (2.2%)                        |
| Unknown                                     | 5 (4.9%)          | 0 (0.0%)                     | 0 (0.0%)                      | 5 (7.5%)                       | 4 (8.7%)                        |
| <b>Sex worker</b>                           | 5 (4.9%)          | 1 (2.8%)                     | 0 (0.0%)                      | 4 (6.0%)                       | 3 (4.1%)                        |

Abbreviations: max, maximum; min, minimum; MSW, men who have sex with women; SD, standard deviation; STI, sexually transmitted infection.

<sup>1</sup> Educational level; Low: no education, elementary school, (pre-)vocational education; Middle: senior secondary education, pre-university education; High: university of applied sciences, university.

## Supplementary Figure

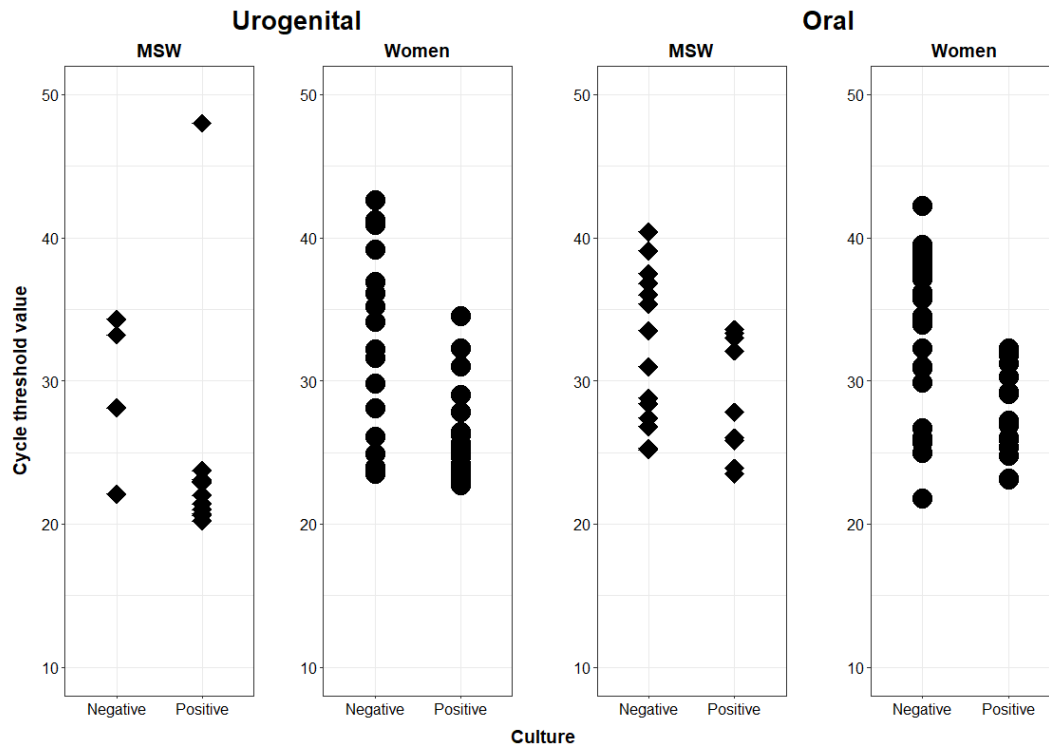

**Supplementary Figure 1.** Comparison of cobas® cycle threshold values with culture result.

Abbreviations: MSW, men who have sex with women.
